# Supplementary material for: Magnetic semiconducting borophenes and their derivatives
Source: Royal Society of Chemistry journal article supplement (doi:10.1039/d3cp04069k), 2023-01-01
Supplement: d3cp04069k1.pdf [file d3cp04069k1.pdf]

Electronic Supplementary Information for

**Magnetic semiconducting borophenes and their derivatives**

Bo Chen,\* Lin Xue, Yan Han, Zhi Yang and Yong-Jia Zhang

College of Physics, Taiyuan University of Technology, Taiyuan 030024, P. R. China

Corresponding author Email: chenbo@tyut.edu.cn

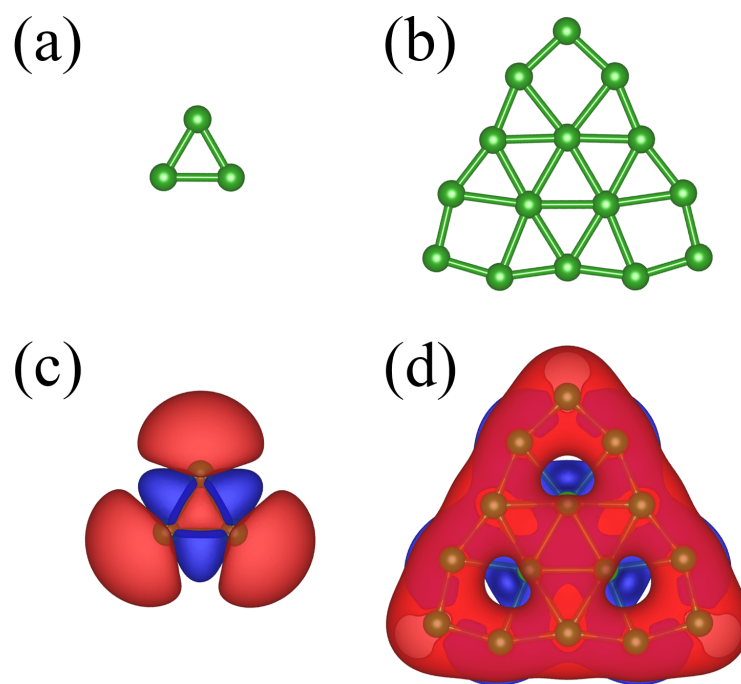

**Figure S1.** (a-b) Optimized structures and (c-d) corresponding spin charge density distributions of  $B_3$  and  $B_{15}$  triangular motifs. The red/blue color denotes electron spin up/down, respectively.

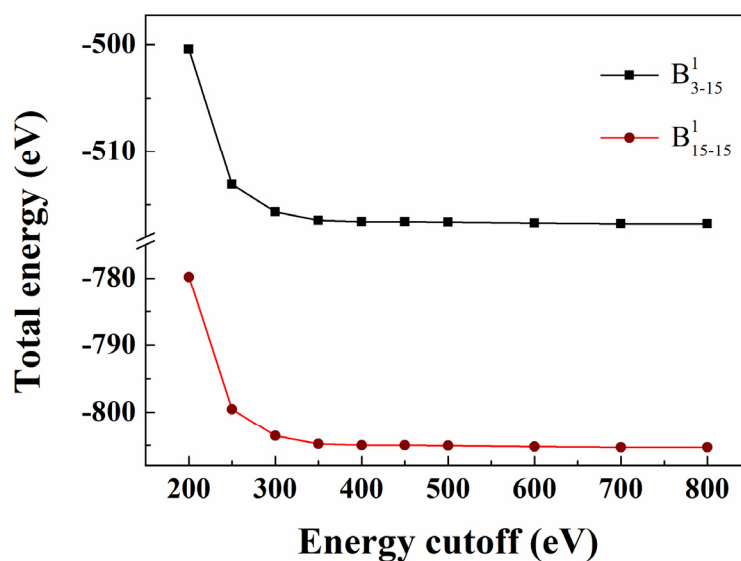

**Figure S2.** Total energies of  $2 \times 2$  supercells for FM  $B_{3-15}^1$  and  $B_{15-15}^1$  monolayers versus the energy cutoff.

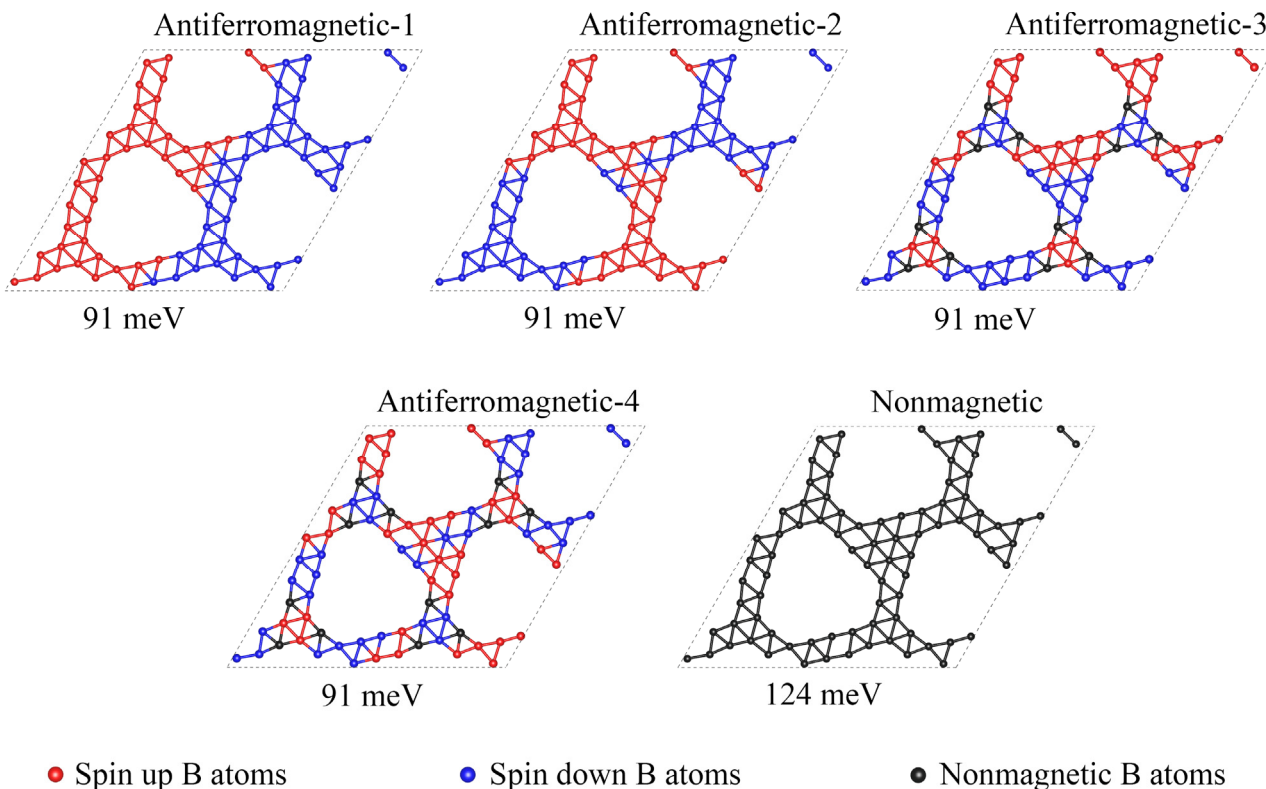

**Figure S3.** Geometric structures for  $2 \times 2$  supercells of monolayer  $B_{3,15}^I$  in AFM and NM configurations, and their corresponding relative energies with respect to the FM state shown in the left panel of Fig. 1 in the main text.

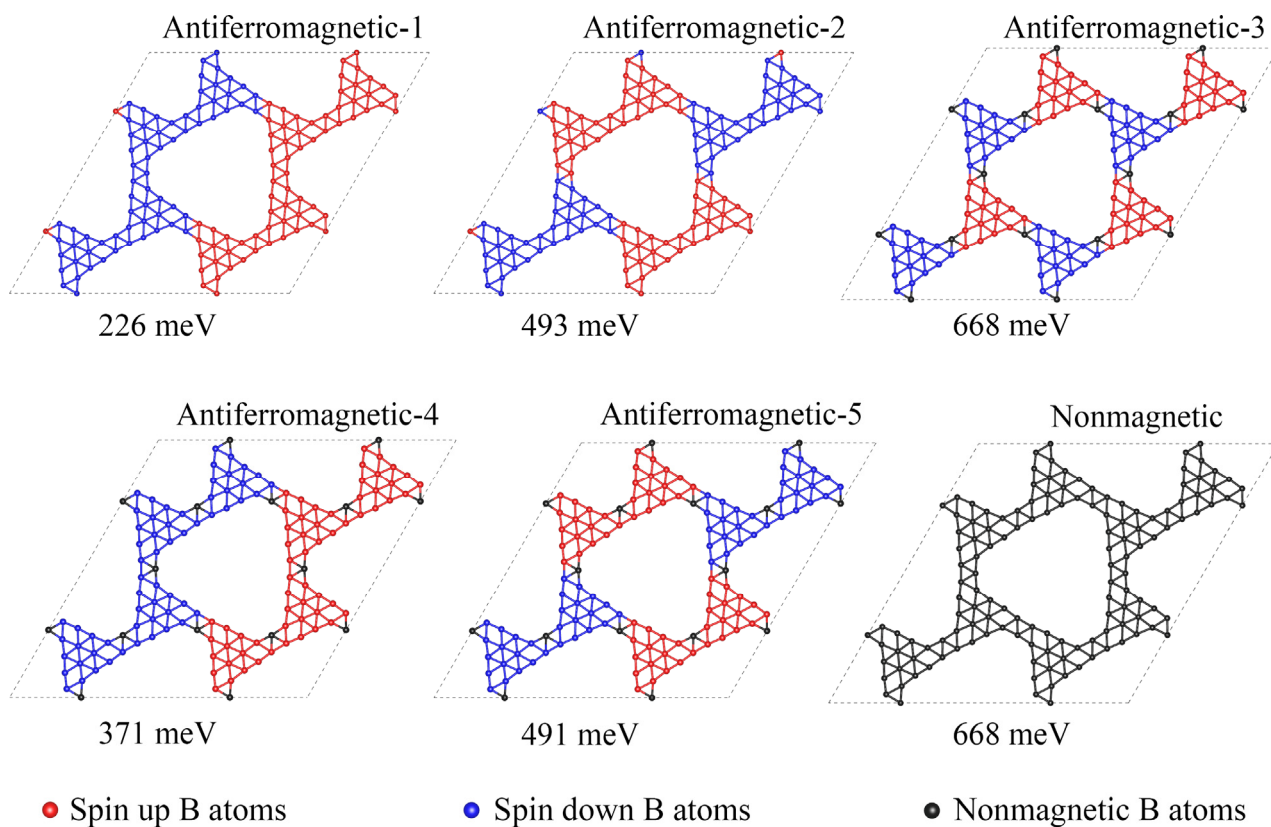

**Figure S4.** Geometric structures for  $2 \times 2$  supercells of monolayer  $B_{15,15}^I$  in AFM and NM configurations, and their corresponding relative energies with respect to the FM state shown in the right panel of Fig. 1 in the main text.

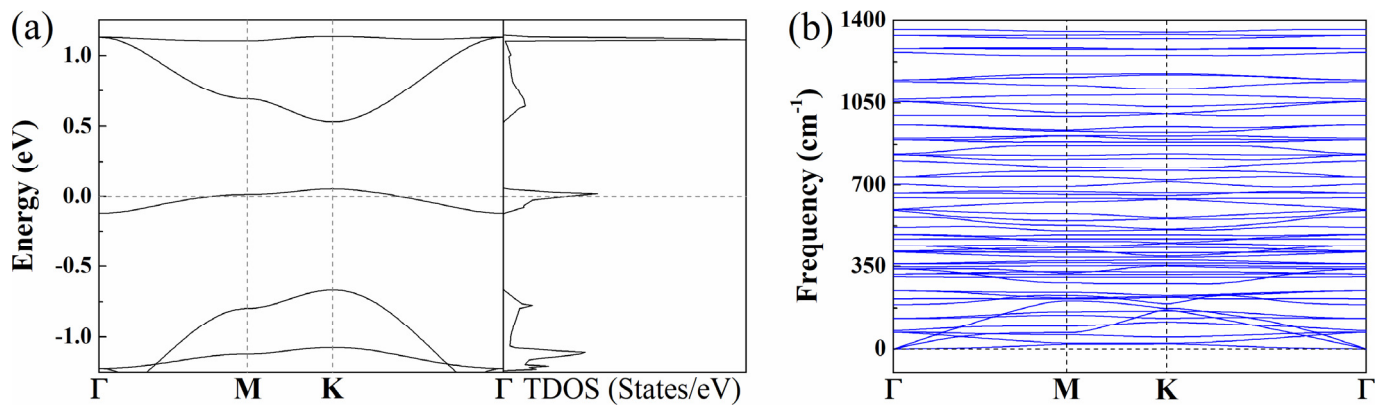

**Figure S5.** (a) Band structure, total density of states (TDOS), and (b) phonon spectrum for monolayer  $B_{3,15}^1$  with NM ordering. The Fermi level in (a) is set to zero.

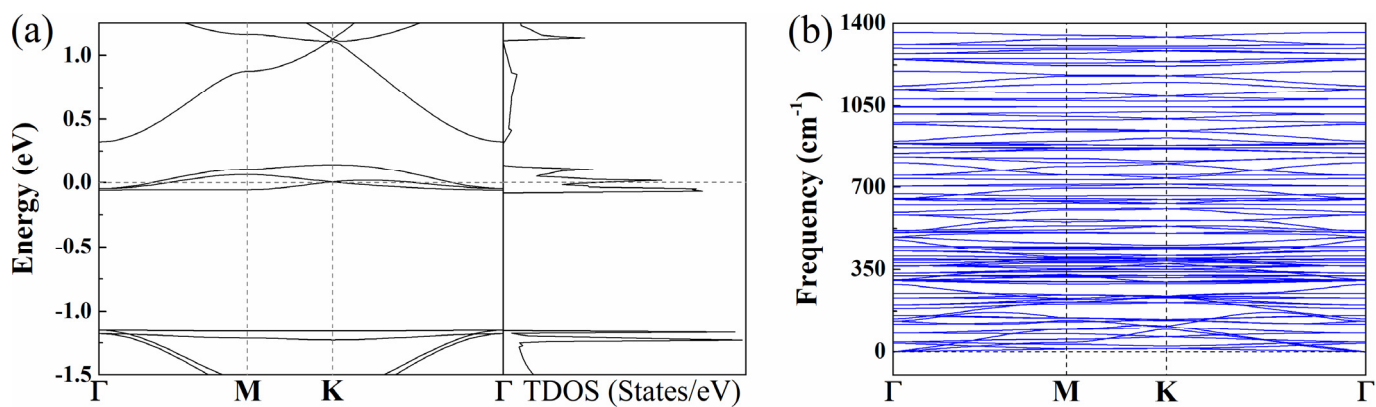

**Figure S6.** (a) Band structure, TDOS, and (b) phonon spectrum for monolayer  $B_{15,15}^1$  with NM ordering. The Fermi level in (a) is set to zero.

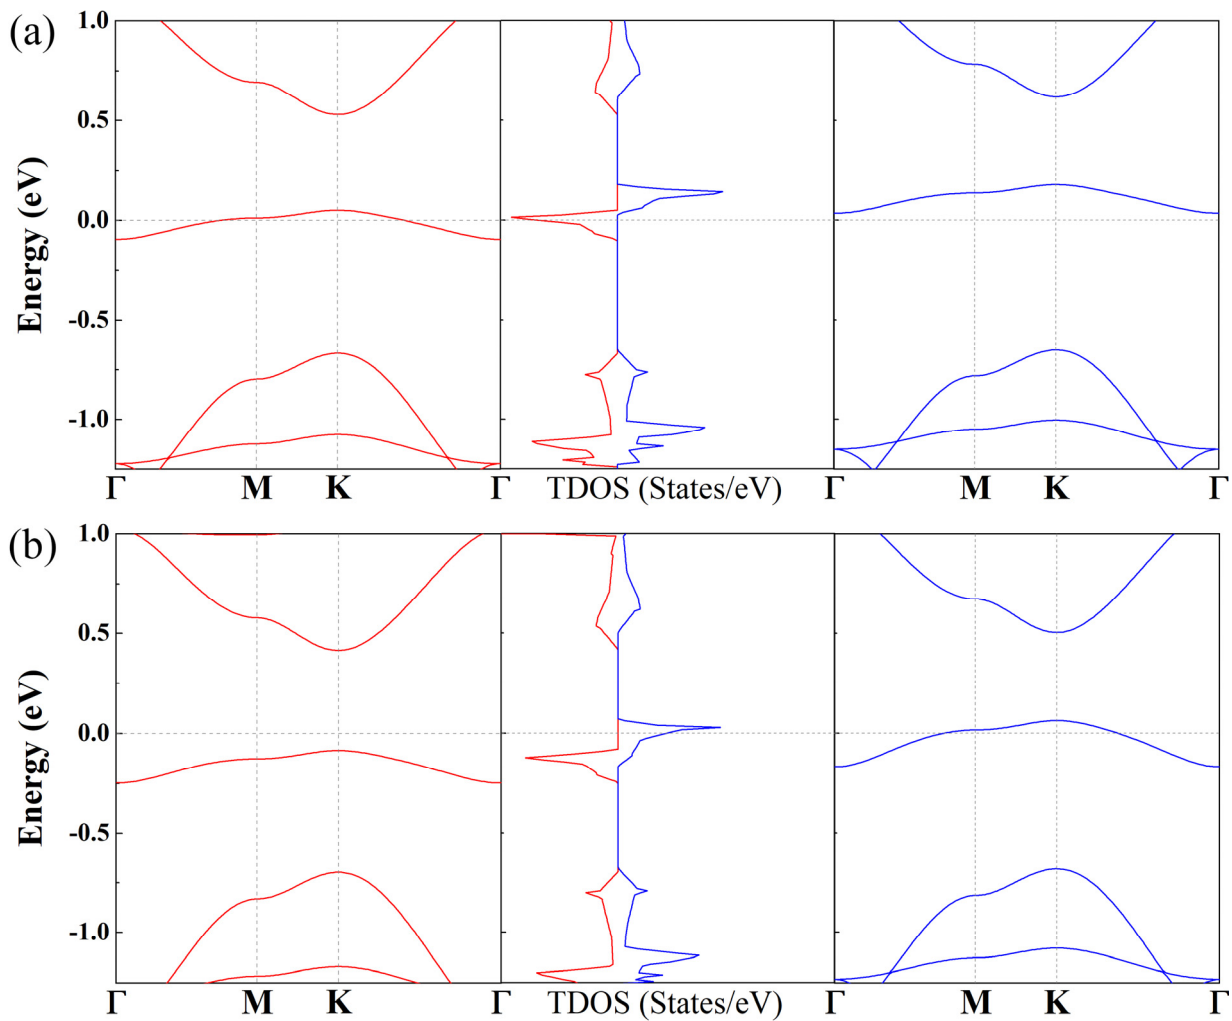

**Figure S7.** Band structures and TDOS of (a) hole doped and (b) electron doped FM  $B_{3,15}^I$  monolayer, calculated at the PBE level of theory. The doping concentration is  $-0.5e/0.5e$  per primitive cell for hole/electron doping. Fermi energy is set to zero.

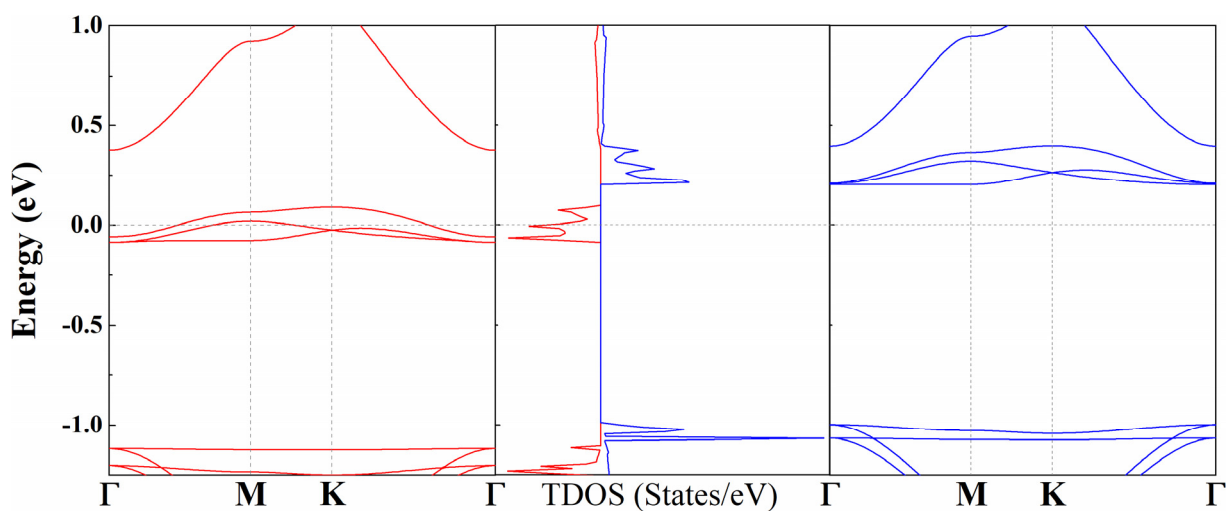

**Figure S8.** Band structures and TDOS of hole doped FM  $B_{15,15}^I$  monolayer, calculated at the PBE level of theory. The doping concentration is  $-e$  per primitive cell. Fermi energy is set to zero.

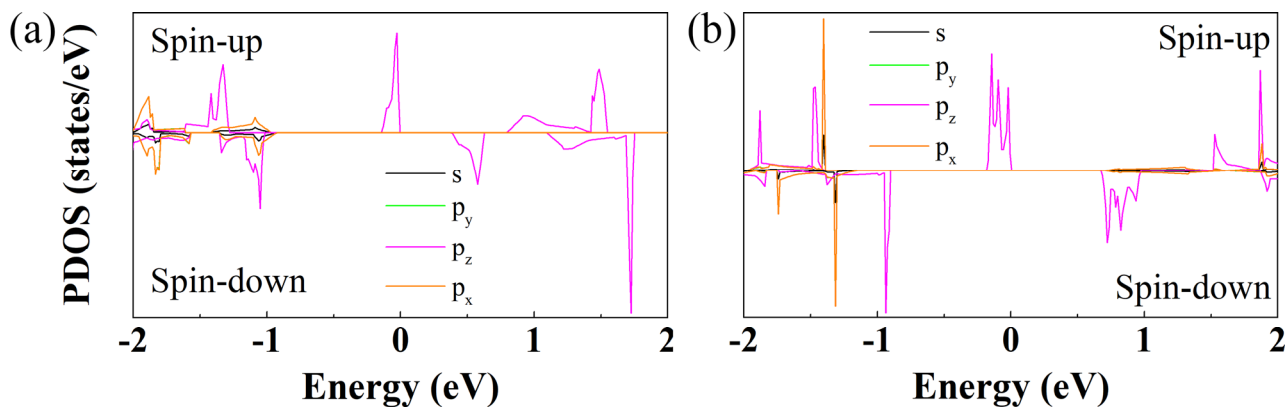

**Figure S9.** Projected density of states (PDOS) for monolayer (a)  $B_{3-15}^1$  and (b)  $B_{15-15}^1$  at FM ground state. Fermi level is set as zero.

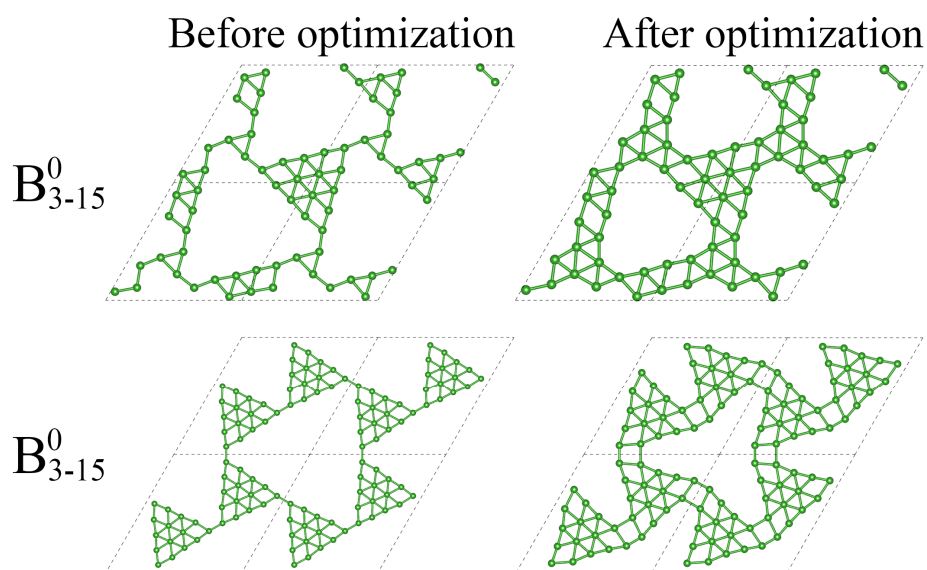

**Figure S10.** Top view of the initial and optimized structures for monolayer  $B_{3-15}^0$  and  $B_{15-15}^0$ .

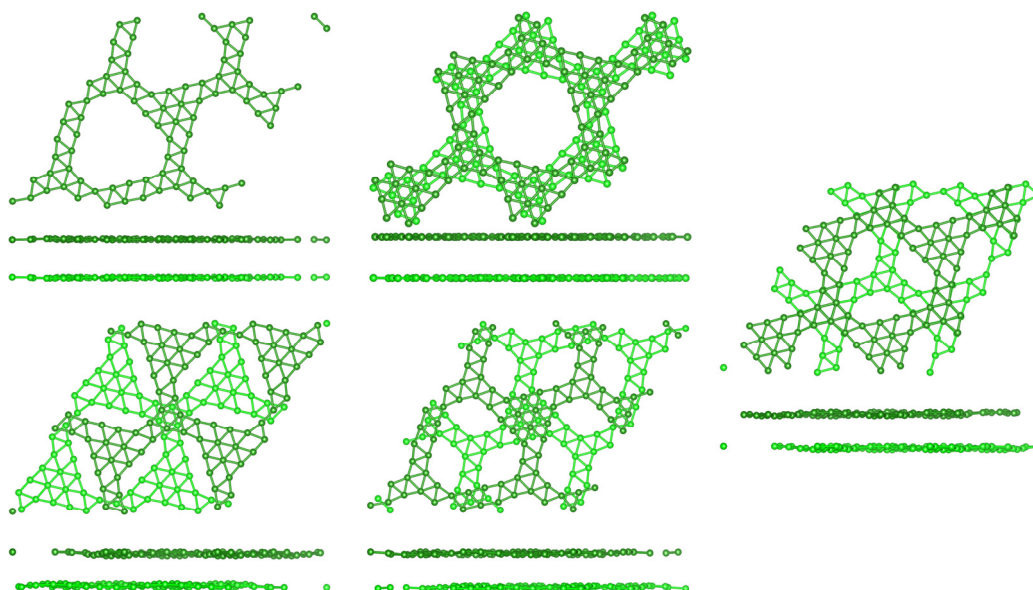

**Figure S11.** Schematics of the high-symmetry stackings in bilayer  $B_{3-15}^1$ . Different boron atomic layers are distinguished by color.

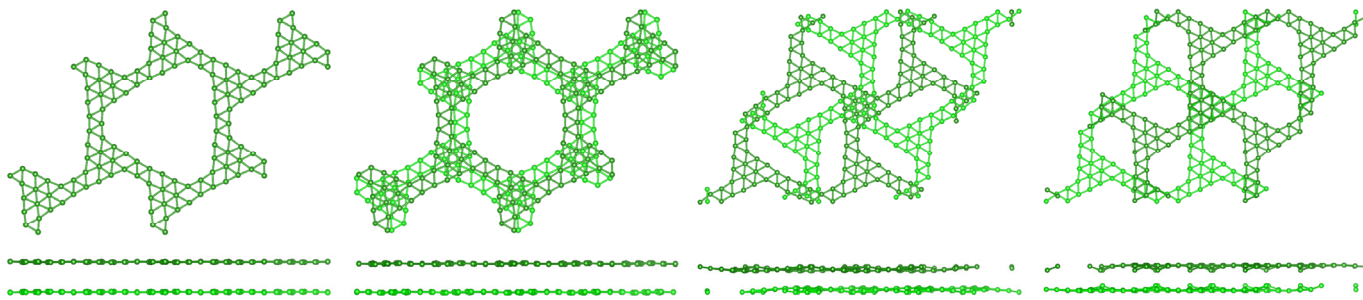

**Figure S12.** Schematics of the high-symmetry stackings in bilayer  $B_{15-15}^1$ . Different boron atomic layers are distinguished by color.

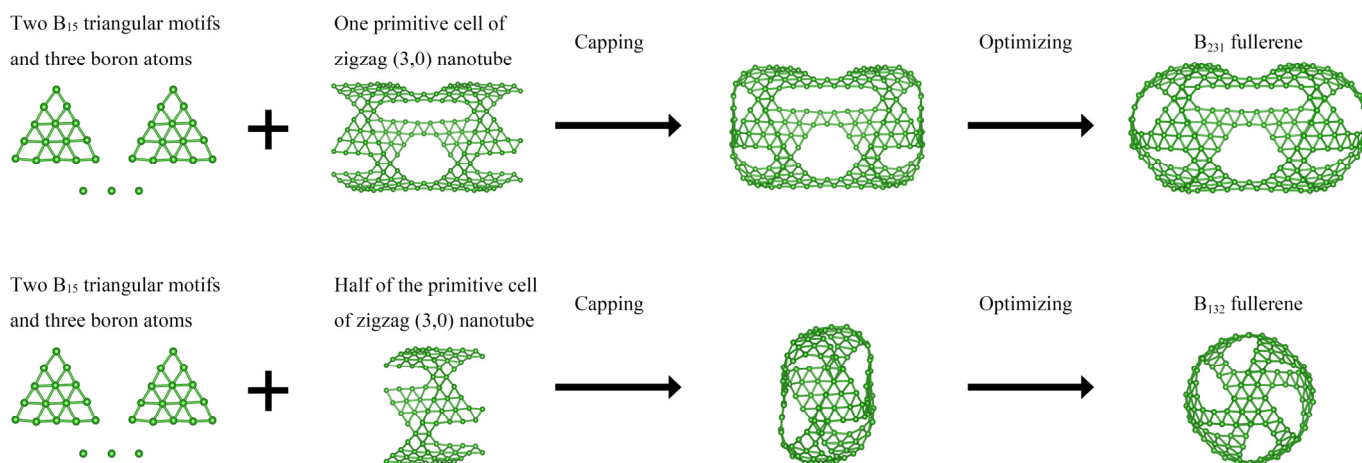

**Figure S13.** Manufacture processes of the  $B_{231}$  (up panel) and  $B_{132}$  (lower panel) fullerenes.

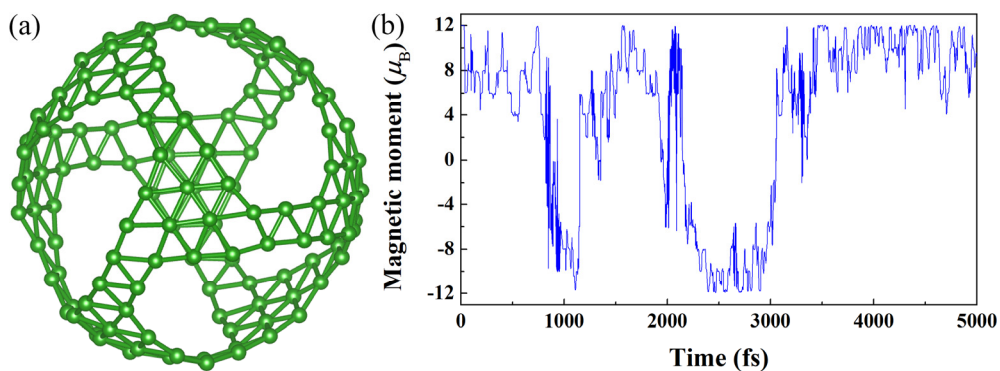

**Figure S14.** (a) Snap shot of  $B_{132}$  fullerene at the end of *ab initio* molecular dynamics simulation performed at 300 K for 5 ps, and (b) the corresponding change of total magnetic moment with simulation time step.

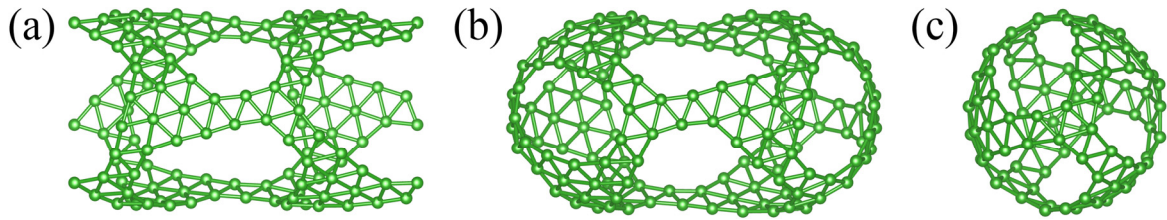

**Figure S15.** Optimized structures of (a) zigzag (3,0) nanotube with magnetic moment of about  $6.00 \mu_B$  per primitive cell, (b)  $B_{147}$  and  $B_{84}$  fullerenes with total magnetic moment of 6.48 and  $2.00 \mu_B$ , respectively. Nanotube and fullerenes are built based on the monolayer  $B_{3-15}^1$  borophene.

Similarly, magnetic  $B_{63m+21}$  fullerenes could be constructed via capping the zigzag (3,0) nanotube with one  $B_{15}$  triangular motif, one  $B_3$  triangular motif, and three boron atoms, where  $m$  is a positive integer and the number of half of the primitive cell of zigzag (3,0) nanotube built based on the monolayer  $B_{3-15}^1$  borophene.

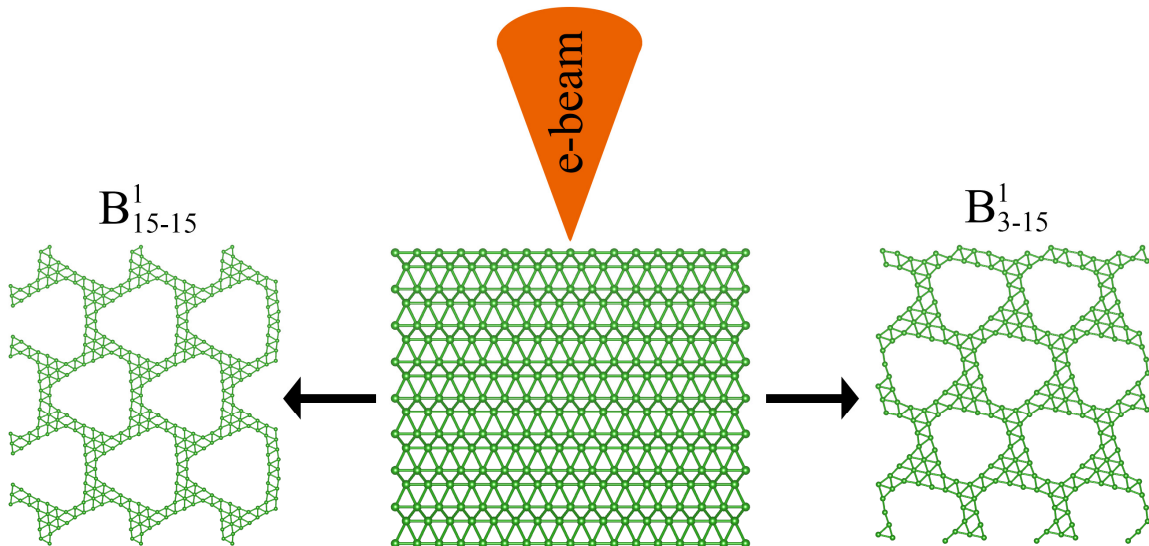

**Figure S16.** Schematic illustration of the e-beam fabrication of monolayer  $B_{3-15}^1$  and  $B_{15-15}^1$  borophenes by selective sputtering the boron atoms from a freestanding borophene in buckled triangular structure.
